# Supplementary material for: EZHIP constrains Polycomb Repressive Complex 2 activity in germ cells
Source: Springer Nature journal article supplement (doi:10.1038/s41467-019-11800-x), 2019-08-26
Supplement: MOESM3 [file 41467_2019_11800_MOESM3_ESM.pdf › 41467_2019_11800_MOESM3_ESM.pdf]

## Reporting Summary

Nature Research wishes to improve the reproducibility of the work that we publish. This form provides structure for consistency and transparency in reporting. For further information on Nature Research policies, see [Authors & Referees](#) and the [Editorial Policy Checklist](#).

### Statistical parameters

When statistical analyses are reported, confirm that the following items are present in the relevant location (e.g. figure legend, table legend, main text, or Methods section).

n/a Confirmed

- ☐ ☒ The exact sample size ( $n$ ) for each experimental group/condition, given as a discrete number and unit of measurement
- ☐ ☒ An indication of whether measurements were taken from distinct samples or whether the same sample was measured repeatedly
- ☐ ☒ The statistical test(s) used AND whether they are one- or two-sided  
*Only common tests should be described solely by name; describe more complex techniques in the Methods section.*
- ☒ ☐ A description of all covariates tested
- ☐ ☒ A description of any assumptions or corrections, such as tests of normality and adjustment for multiple comparisons
- ☐ ☒ A full description of the statistics including central tendency (e.g. means) or other basic estimates (e.g. regression coefficient) AND variation (e.g. standard deviation) or associated estimates of uncertainty (e.g. confidence intervals)
- ☒ ☐ For null hypothesis testing, the test statistic (e.g.  $F$ ,  $t$ ,  $r$ ) with confidence intervals, effect sizes, degrees of freedom and  $P$  value noted  
*Give  $P$  values as exact values whenever suitable.*
- ☒ ☐ For Bayesian analysis, information on the choice of priors and Markov chain Monte Carlo settings
- ☒ ☐ For hierarchical and complex designs, identification of the appropriate level for tests and full reporting of outcomes
- ☒ ☐ Estimates of effect sizes (e.g. Cohen's  $d$ , Pearson's  $r$ ), indicating how they were calculated
- ☐ ☒ Clearly defined error bars  
*State explicitly what error bars represent (e.g. SD, SE, CI)*

Our web collection on [statistics for biologists](#) may be useful.

### Software and code

Policy information about [availability of computer code](#)

Data collection

Imaging data, protein analysis have been collected with specific software described in the Material and Method section.

Data analysis

All analyses were performed using existing tools with version and parameters detailed in the methods section.

For manuscripts utilizing custom algorithms or software that are central to the research but not yet described in published literature, software must be made available to editors/reviewers upon request. We strongly encourage code deposition in a community repository (e.g. GitHub). See the Nature Research [guidelines for submitting code & software](#) for further information.

### Data

Policy information about [availability of data](#)

All manuscripts must include a [data availability statement](#). This statement should provide the following information, where applicable:

- Accession codes, unique identifiers, or web links for publicly available datasets
- A list of figures that have associated raw data
- A description of any restrictions on data availability

All information are provided in manuscript under "Data availability"

## Field-specific reporting

Please select the best fit for your research. If you are not sure, read the appropriate sections before making your selection.

☒ Life sciences ☐ Behavioural & social sciences ☐ Ecological, evolutionary & environmental sciences

For a reference copy of the document with all sections, see [nature.com/authors/policies/ReportingSummary-flat.pdf](https://www.nature.com/authors/policies/ReportingSummary-flat.pdf)

## Life sciences study design

All studies must disclose on these points even when the disclosure is negative.

|                 |                                                                                                                                                                                         |
|-----------------|-----------------------------------------------------------------------------------------------------------------------------------------------------------------------------------------|
| Sample size     | All experiments were repeated by analyzing independent biological replicates.<br>When comparing cell lines, experiments were done at different times with independent batches of cells. |
| Data exclusions | Experiments were excluded when controls (positive or negative) did not follow the expected trend.                                                                                       |
| Replication     | Experiments have been repeated at least twice with variable "n" according to the type of experiment.                                                                                    |
| Randomization   | n/a                                                                                                                                                                                     |
| Blinding        | n/a                                                                                                                                                                                     |

## Reporting for specific materials, systems and methods

### Materials & experimental systems

|                                     |                                                                 |
|-------------------------------------|-----------------------------------------------------------------|
| n/a                                 | Involved in the study                                           |
| <input checked="" type="checkbox"/> | <input type="checkbox"/> Unique biological materials            |
| <input type="checkbox"/>            | <input checked="" type="checkbox"/> Antibodies                  |
| <input type="checkbox"/>            | <input checked="" type="checkbox"/> Eukaryotic cell lines       |
| <input checked="" type="checkbox"/> | <input type="checkbox"/> Palaeontology                          |
| <input type="checkbox"/>            | <input checked="" type="checkbox"/> Animals and other organisms |
| <input checked="" type="checkbox"/> | <input type="checkbox"/> Human research participants            |

### Methods

|                                     |                                                    |
|-------------------------------------|----------------------------------------------------|
| n/a                                 | Involved in the study                              |
| <input type="checkbox"/>            | <input checked="" type="checkbox"/> ChIP-seq       |
| <input type="checkbox"/>            | <input checked="" type="checkbox"/> Flow cytometry |
| <input checked="" type="checkbox"/> | <input type="checkbox"/> MRI-based neuroimaging    |

## Antibodies

|                 |                                                                                                                                                                                                                                                                                                                                                                                                                                                                                                                                                                                                                                                                                                                                                                                                                                                                                                                                                                                                                                                                                                                                                                                                                                                     |
|-----------------|-----------------------------------------------------------------------------------------------------------------------------------------------------------------------------------------------------------------------------------------------------------------------------------------------------------------------------------------------------------------------------------------------------------------------------------------------------------------------------------------------------------------------------------------------------------------------------------------------------------------------------------------------------------------------------------------------------------------------------------------------------------------------------------------------------------------------------------------------------------------------------------------------------------------------------------------------------------------------------------------------------------------------------------------------------------------------------------------------------------------------------------------------------------------------------------------------------------------------------------------------------|
| Antibodies used | <p>Antibodies against EZH1/2, SUZ12, JARID2 and EED have been previously described 33,61. RBAP48 mouse mAb (GWB-C12FDE) was purchased GenWay Biotech; H3 mAb (39163) and H3K27me2 mAb (61435) were purchased from Active Motif. Polyclonal Rabbit against H3 from cell signalling (9715); H3K9me2 (Ab1220) and H3K27Ac (Ab 4729) have been purchased from Abcam; H3K27me1 mouse mAb C0321 from Active Motif; H3K27me2 Rabbit mAb D18C8 (9728), H3K27me3 Rabbit mAb C36B11 (9733); H3K4me3 Rabbit mAb C42D8 (9751), Rabbit mAb D7C6X (14129) and mouse mAb10E2 HDAC1 (5356S) from Ozyme (Cell Signaling Technology); hGPIF (HPA006128) and mAb Flag-M2 (F1804) purchased from SIGMA; Anti-Germ cell specific Rabbit Polyclonal DPP3A/Stella (19878) and TRA98 (Ab82527) Rat monoclonal one from Abcam.</p> <p>Antibody against mGPIF was raised against the two following synthetic peptides: CAESSRAESDQSSPAG (corresponding to a.a. 91-106) and CAQSAGRNLRRPRSS (corresponding to a.a. 192-206). Anti mouse CD49f-PE clone GoH3 (Becton Dickinson) Anti mouse c-kit-APC clone 2B8 (Becton Dickinson) Anti mouse beta-2 microglobulin-FITC clone S19.8 (Santa Cruz) Anti-mouse <math>\beta</math>-TUBULIN was purchased from Invitrogen 32–2600</p> |
| Validation      | - Antibodies against EZH1/2, SUZ12, JARID2 and EED have been validated in their respective knock-out cell lines by lack of signal.                                                                                                                                                                                                                                                                                                                                                                                                                                                                                                                                                                                                                                                                                                                                                                                                                                                                                                                                                                                                                                                                                                                  |

- RBAP48 mouse mAb (GWB-C12FDE) was validated on overexpressed protein.

- H3 mAb (39163) has been purchased from Active Motif and validated with recombinant protein;

- H3 polyclonal Rabbit one from cell signalling (9715) and has been validated by the manufacturer (<https://www.cellsignal.com/products/primary-antibodies/histone-h3-antibody/9715>);

-H3K9me2 (Ab1220) and H3K27Ac (Ab 4729) from Abcam have been validated by peptide arrays;

-H3K27me1 mouse mAb C0321 from Active Motif has been validated by peptide-array;

H3K27me2 Rabbit mAb D18C8 (9728), H3K27me3 Rabbit mAb C36B11 (9733) have been validated by lack of signal in Eed knockout cell;

-H3K4me3 Rabbit mAb C42D8 (9751), validation by manufacturer (<https://www.cellsignal.com/products/primary-antibodies/tri-methyl-histone-h3-lys4-c42d8-rabbit-mab/9751>))

- mAb10E2 HDAC1 (5356S) from Ozyme (Cell Signaling Technologies) has been validated by the manufacturer (<https://www.cellsignal.com/products/primary-antibodies/hdac1-10e2-mouse-mab/5356>);

- hGPIF (HPA006128) has been validated in the GPIF knockout line

- mAb Flag-M2 (F1804, Sigma), validation by protein overexpression;

- Anti-Germ cell specific rabbit Polyclonal DPP3A/Stella (19878) validated by Abcam (<https://www.abcam.com/stella-antibody-ab19878.html>);

- TRA98 (Ab82527) Rat monoclonal has been validated by Abcam (<https://www.abcam.com/germ-cell-specific-antigen-antibody-tra98-ab82527.html>);

- Antibody against mGPIF was raised against the two following synthetic peptides and validated in the knockout extracts.

- Anti mouse CD49f-PE clone GoH3 (Becton Dickinson) has been validated by the manufacturer (<http://www.bdbiosciences.com/eu/applications/research/stem-cell-research/cancer-research/human/pe-rat-anti-human-cd49f-goh3/p/555736>)

- Anti mouse c-kit-APC clone 2B8 (Becton Dickinson) has been validated by the manufacturer (<http://www.bdbiosciences.com/eu/applications/research/stem-cell-research/cancer-research/mouse/apc-rat-anti-mouse-cd117-2b8/p/561074>)

- Anti mouse beta-2 microglobulin-FITC clone S19.8 (Santa Cruz) has been validated by the manufacturer (<https://www.scbt.com/scbt/product/beta-2-microglobulin-antibody-s19-8>)

Anti-mouse  $\beta$ -TUBULIN 32–2600 was validated by Invitrogen

## Eukaryotic cell lines

Policy information about [cell lines](#)

|                                                                      |                                                                   |
|----------------------------------------------------------------------|-------------------------------------------------------------------|
| Cell line source(s)                                                  | U2OS were purchased from ATCC; Hela-S3 provided By S. Ait-Si-Ali. |
| Authentication                                                       | None of the cell lines used were authenticated.                   |
| Mycoplasma contamination                                             | Mycoplasma tests were run on monthly base.                        |
| Commonly misidentified lines<br>(See <a href="#">ICLAC</a> register) | n/a                                                               |

## Animals and other organisms

Policy information about [studies involving animals](#); [ARRIVE guidelines](#) recommended for reporting animal research

|                         |                                                                                                                                                                                                                                                                                                                                                                                                                                                                                                                                                                                                                                                                                               |
|-------------------------|-----------------------------------------------------------------------------------------------------------------------------------------------------------------------------------------------------------------------------------------------------------------------------------------------------------------------------------------------------------------------------------------------------------------------------------------------------------------------------------------------------------------------------------------------------------------------------------------------------------------------------------------------------------------------------------------------|
| Laboratory animals      | CRISPR/Cas9 Gpif knockout mice line has been generated on a C57B6N genetic background. Phenotype analysis has been performed after back-crossing twice the mutated line with C57B6N mice. Adult (from 3 months old onwards) males wt have been compared to hemizygous siblings or litter mates of the same age. P17 knockout and heterozygous litter-mates have been employed in prepubertal analysis. 4-5 months old adult females wt, heterozygous and knockout litter-mates have been used in phenotypic analysis. Females with same age have been compared. 6 weeks young wt and knockout females have been crossed in the same cage to a fertile male for 20 weeks to compare fertility. |
| Wild animals            | n/a                                                                                                                                                                                                                                                                                                                                                                                                                                                                                                                                                                                                                                                                                           |
| Field-collected samples | n/a                                                                                                                                                                                                                                                                                                                                                                                                                                                                                                                                                                                                                                                                                           |

## ChIP-seq

Data deposition

- ☒ Confirm that both raw and final processed data have been deposited in a public database such as [GEO](#).
- ☒ Confirm that you have deposited or provided access to graph files (e.g. BED files) for the called peaks.

|                                        |                                                        |                 |              |          |    |
|----------------------------------------|--------------------------------------------------------|-----------------|--------------|----------|----|
| Data access links                      | NGS data are deposited on GEO, GSE130231 and released. |                 |              |          |    |
| May remain private before publication. |                                                        |                 |              |          |    |
| Files in database submission           | GSM3734215                                             | U2OS_WT_1       | Apr 01, 2020 | approved | BW |
|                                        | GSM3734216                                             | U2OS_WT_2       | Apr 01, 2020 | approved | BW |
|                                        | GSM3734217                                             | U2OS_dEED_1     | Apr 01, 2020 | approved | BW |
|                                        | GSM3734218                                             | U2OS_dEED_2     | Apr 01, 2020 | approved | BW |
|                                        | GSM3734219                                             | U2OS_dCXORF67_1 | Apr 01, 2020 | approved | BW |

|            |                                                                                 |              |          |      |
|------------|---------------------------------------------------------------------------------|--------------|----------|------|
| GSM3734220 | U2OS_dCXORF67_2                                                                 | Apr 01, 2020 | approved | BW   |
| GSM3734221 | U2OS_WT-1-IgG                                                                   | Apr 01, 2020 | approved | BW   |
| GSM3734222 | U2OS_WT-2-IgG                                                                   | Apr 01, 2020 | approved | BW   |
| GSM3734223 | U2OS_WT-1-K27ac                                                                 | Apr 01, 2020 | approved | BW   |
| GSM3734224 | U2OS_WT-2-K27ac                                                                 | Apr 01, 2020 | approved | BW   |
| GSM3734225 | U2OS_WT-1-K27me2                                                                | Apr 01, 2020 | approved | BW   |
| GSM3734226 | U2OS_WT-2-K27me2                                                                | Apr 01, 2020 | approved | BW   |
| GSM3734227 | U2OS_WT-1-H2A-ub                                                                | Apr 01, 2020 | approved | BW   |
| GSM3734228 | U2OS_WT-2-H2A-ub                                                                | Apr 01, 2020 | approved | BW   |
| GSM3734229 | U2OS_ko-1-IgG                                                                   | Apr 01, 2020 | approved | BW   |
| GSM3734230 | U2OS_ko-2-IgG                                                                   | Apr 01, 2020 | approved | BW   |
| GSM3734231 | U2OS_ko-1-K27ac                                                                 | Apr 01, 2020 | approved | BW   |
| GSM3734232 | U2OS_ko-2-K27ac                                                                 | Apr 01, 2020 | approved | BW   |
| GSM3734233 | U2OS_ko-1-K27me2                                                                | Apr 01, 2020 | approved | BW   |
| GSM3734234 | U2OS_ko-2-K27me2                                                                | Apr 01, 2020 | approved | BW   |
| GSM3734235 | U2OS_ko-1-H2A-ub                                                                | Apr 01, 2020 | approved | BW   |
| GSM3734236 | U2OS_ko-2-H2A-ub                                                                | Apr 01, 2020 | approved | BW   |
| GSM3737367 | U2OS_dCXORF67_Suzcom-1                                                          | Apr 01, 2020 | approved | BW   |
| GSM3737368 | U2OS_dCXORF67_Suzcom_2                                                          | Apr 01, 2020 | approved | BW   |
| GSM3737369 | U2OS_dEED_Suzcom_1                                                              | Apr 01, 2020 | approved | BW   |
| GSM3737370 | U2OS_dEED_Suzcom_2                                                              | Apr 01, 2020 | approved | BW   |
| GSM3737371 | U2OS_WT_Suzcom_1                                                                | Apr 01, 2020 | approved | BW   |
| GSM3737372 | U2OS_WT_Suzcom_2                                                                | Apr 01, 2020 | approved | BW   |
| -----      |                                                                                 |              |          |      |
| GSE130229  | EZH1P constrains Polycomb Repressive Complex 2 activity in germ cells (RNA-Seq) | Apr 01, 2020 | approved | None |
| GSM3734182 | dCXorf67cl29_1                                                                  | Apr 01, 2020 | approved | TAB  |
| GSM3734183 | dCXorf67cl29_2                                                                  | Apr 01, 2020 | approved | TAB  |
| GSM3734184 | dEEDcl71                                                                        | Apr 01, 2020 | approved | TAB  |
| GSM3734185 | dEEDcl72                                                                        | Apr 01, 2020 | approved | TAB  |
| GSM3734186 | WT1                                                                             | Apr 01, 2020 | approved | TAB  |
| GSM3734187 | WT2                                                                             | Apr 01, 2020 | approved | TAB  |
| GSM3734188 | WT_oocytes_2                                                                    | Apr 01, 2020 | approved | TAB  |
| GSM3734189 | WT_oocytes_1                                                                    | Apr 01, 2020 | approved | TAB  |
| GSM3734190 | KO_oocytes_2                                                                    | Apr 01, 2020 | approved | TAB  |
| GSM3734191 | KO_oocytes_1                                                                    | Apr 01, 2020 | approved | TAB  |
| GSM3734192 | KO_Kitmoins_1                                                                   | Apr 01, 2020 | approved | TAB  |
| GSM3734193 | KO_Kitmoins_2                                                                   | Apr 01, 2020 | approved | TAB  |
| GSM3734194 | WT_Kitmoins_1                                                                   | Apr 01, 2020 | approved | TAB  |
| GSM3734195 | WT_Kitmoins_2                                                                   | Apr 01, 2020 | approved | TAB  |
| GSM3734196 | 46_MII_WT                                                                       | Apr 01, 2020 | approved | TAB  |
| GSM3734197 | 47_MII_WT                                                                       | Apr 01, 2020 | approved | TAB  |
| GSM3734198 | 48_MII_WT                                                                       | Apr 01, 2020 | approved | TAB  |
| GSM3734199 | 49_MII_WT                                                                       | Apr 01, 2020 | approved | TAB  |
| GSM3734200 | 50_MII_WT                                                                       | Apr 01, 2020 | approved | TAB  |
| GSM3734201 | 51_MII_WT                                                                       | Apr 01, 2020 | approved | TAB  |
| GSM3734202 | 52_MII_WT                                                                       | Apr 01, 2020 | approved | TAB  |
| GSM3734203 | 54_MII_WT                                                                       | Apr 01, 2020 | approved | TAB  |
| GSM3734204 | 55_MII_WT                                                                       | Apr 01, 2020 | approved | TAB  |
| GSM3734205 | 56_MII_KO                                                                       | Apr 01, 2020 | approved | TAB  |
| GSM3734206 | 57_MII_KO                                                                       | Apr 01, 2020 | approved | TAB  |
| GSM3734207 | 58_MII_KO                                                                       | Apr 01, 2020 | approved | TAB  |
| GSM3734208 | 59_MII_KO                                                                       | Apr 01, 2020 | approved | TAB  |
| GSM3734209 | 60_MII_KO                                                                       | Apr 01, 2020 | approved | TAB  |
| GSM3734210 | 61_MII_KO                                                                       | Apr 01, 2020 | approved | TAB  |
| GSM3734211 | 62_MII_KO                                                                       | Apr 01, 2020 | approved | TAB  |
| GSM3734212 | 63_MII_KO                                                                       | Apr 01, 2020 | approved | TAB  |
| GSM3734213 | 64_MII_KO                                                                       | Apr 01, 2020 | approved | TAB  |
| GSM3734214 | 65_MII_KO                                                                       | Apr 01, 2020 | approved | TAB  |

Genome browser session  
(e.g. [UCSC](#))

see data access links for bigWig and peak BED files

## Methodology

Replicates

2 biological replicates were performed for each NGS analysis.

Sequencing depth

Information provided in materials and methods

Antibodies

Information provided above in the antibody description.

Peak calling parameters

Peaks were called with MACS2 on combined replicates using the EED KO as a control for the K27me3 and SUZ12 ChIP and IgG control for CUT&RUN samples with the following parameters: -f BAM --gsize hs --broad --broad-cutoff 0.1 --bdg. Reads

were counted in bins of length 50 and RPKM normalized and converted to bigWig format using DeepTools bamCoverage (2.4.1). Spike-in normalization: reads mapping to the drosophila genome were counted into 10kb bins and scale factors were calculated using DESeq2 estimateSizeFactors.

Data quality

Raw data was assessed using FastQC and correlation coefficients were computed for biological replicates.

Software

all analysis was performed using existing software and parameters and versions are detailed in the methods

## Flow Cytometry

### Plots

Confirm that:

- ☒ The axis labels state the marker and fluorochrome used (e.g. CD4-FITC).
- ☒ The axis scales are clearly visible. Include numbers along axes only for bottom left plot of group (a 'group' is an analysis of identical markers).
- ☒ All plots are contour plots with outliers or pseudocolor plots.
- ☒ A numerical value for number of cells or percentage (with statistics) is provided.

### Methodology

Sample preparation

This part is described in detail in the materials and methods section.

Instrument

Analyses and cell sorting were respectively performed on LSR II and ARIA flow cytometers (Becton Dickinson).

Software

FlowJo V10.4.2 and BD FACSDIVA softwares

Cell population abundance

Purity of post-sort cellular fractions is regularly analysed (reanalysis by flow cytometry according to cell markers used for sorting) and is >95%

Gating strategy

The gating on spermatogenic cellular population in C57B6N mice has been previously described in Corbineau et al., 2017 as referred in the manuscript. An example of gating strategy was not included but will be added upon revision.

- ☒ Tick this box to confirm that a figure exemplifying the gating strategy is provided in the Supplementary Information.
